# Supplementary material for: Human–Animal Bond Generated in a Brief Animal-Assisted Therapy Intervention in Adolescents with Mental Health Disorders
Source: MDPI journal article supplement (doi:10.3390/ani13030358), 2023-01-20
Supplement: s1 [file s1]

## SUPPLEMENTARY MATERIAL

### 1. File S1: Description of dynamics

#### Dynamic 1: AGILITY CIRCUIT

Plan and set up a circuit as an agility track with hoops, cones, and poles. There were parts of the circuit that the participant and dog could go through in tandem, and parts where the participant had to get the dog to go through without a leash (they could use food to help the dog).

#### Dynamic 2: WE ARE TRAINERS

Using methodologies for working respectfully with animals, the adolescent(s) learned how to teach a dog to perform behaviors, and by the same token, learned non-violent learning methodologies based on communication and cooperation.

#### Dynamic 3: DOG TOYS

They made cognitive toys for dogs and then were able to play and interact with the constructed toys and the dog; they were taught respectful and fun ways to play in which goals were achieved based on cooperation.

Different materials were provided and before starting they thought/planned and discussed: what they could make and how they could play with the dog.

#### Dynamic 4: WHICH BOX DO I GET?

We placed some laminated sheets on the floor; each sheet had instructions to perform. The dog would be given a rope-chew that they had to throw and then follow the instructions printed on the sheet where the rope fell.

Example of instructions:

- Act out a movie using mime and have peers guess what the movie is
- Draw a picture while blindfolded (the group decides what to draw)
- Ask the dog to perform a skill
- Give a compliment to each participant
- Explain a current news item

### Dynamic 5: TRAFFIC LIGHT

In this activity, real situations were presented where they had to interpret which reaction would be most appropriate. These were situations that we can classify using the traffic light technique: green (desirable), yellow (improvable), and red (inappropriate).

Situations that favored group cohesion, empathy, and interpersonal relationships were presented. A green hoop, a yellow hoop, and a red hoop were placed on the floor. The participant had to walk with the dog and stop at the hoop in the color he/she thought appropriate.

It facilitated discussion about each situation among the participants, about whether they all felt the same way, how it could be improved, what to avoid and why, etc.

### Dynamic 6: CANINE EMOTIONS

In this dynamic we talked about different dog emotions and how we can interpret what dogs feel. We explained dog body language and signs of calm, and compared with our body language.

It was always compared to our feelings and the situations that trigger them.

It was decided to carry out an intervention of only 2 sessions due to participants' short stays at the center, as these are acute units and a longer intervention would entail the loss of many participants.

## **2. Table S1: “Center for the Study of Animal Wellness Pet Bonding Scale (CSAWPBS)” general results**

| CSAWPBS                                                | ALL<br>[N=114] |     |
|--------------------------------------------------------|----------------|-----|
| Human-dog Bond                                         | 56.4 (18.1)    | 114 |
| 1. The dog visitor likes me.                           | 1.71 (0.81)    | 114 |
| 2. I talk to the dog visitor.                          | 1.75 (1.10)    | 114 |
| 3. I confide in the dog visitor.                       | 1.43 (0.82)    | 114 |
| 4. The dog visitor understands what I say.             | 1.91 (1.11)    | 113 |
| 5. The dog visitor knows when I feel bad.              | 2.59 (1.28)    | 114 |
| 6. The dog visitor is always glad to see me.           | 2.18 (1.16)    | 114 |
| 7. The dog visitor prefers me to others.               | 3.95 (1.12)    | 114 |
| 8. The dog visitor has become my friend.               | 2.01 (1.23)    | 114 |
| 9. I look forward to getting up in the morning on days | 2.03 (1.30)    | 113 |

when I will see the dog visitor.

|                                                           |             |     |
|-----------------------------------------------------------|-------------|-----|
| 10. I tell others about the dog visitor.                  | 2.30 (1.39) | 114 |
| 11. The dog visitor knows when I feel happy               | 2.30 (1.25) | 114 |
| 12. I would like to have the dog visitor come to my home. | 2.06 (1.45) | 114 |
| 13. I will remember the dog visitor after my program.     | 1.32 (0.79) | 114 |
| 14. The dog visitor makes walking easier.                 | 2.62 (1.45) | 114 |
| 15. The dog visitor tries to comfort me.                  | 1.92 (1.11) | 113 |
| 16. The dog visits make me feel better.                   | 1.62 (0.92) | 113 |
| 17. The dog visits are (not) boring.                      | 1.62 (1.02) | 114 |
| 18. I feel attached to the dog visitor.                   | 2.43 (1.33) | 113 |
| 19. The dog visits give me energy.                        | 1.93 (1.11) | 114 |
| 20. I miss the dog visitor between visits.                | 2.34 (1.48) | 114 |
| 21. The dog doesn't judge me.                             | 1.30 (0.87) | 114 |
| 22. I look forward to the dog visits.                     | 1.74 (1.08) | 114 |
| 23. The dog visits make me feel happy.                    | 1.61 (0.89) | 114 |
| 24. The dog accepts me just the way I am.                 | 1.26 (0.62) | 114 |
| 25. I make the dog feel better.                           | 2.35 (1.11) | 112 |
| 26. I make the dog feel happy.                            | 2.19 (1.09) | 112 |
| 27. The dog takes my mind off my troubles.                | 1.96 (1.32) | 112 |
| 2 The dog helps me feel secure.                           | 2.00 (1.29) | 112 |

Total score range: from 28 (always true) to 140 (never true). Individual item range: from 1 (always true) to 5 (never true).

### 3. Supplementary Table S2: "Center for the Study of Animal Wellness Pet Bonding Scale (CSAWPBS)" participant-dog bond according to pet ownership results

| CSAWPBS                                                                                 | No          | Yes         | T-value (Yes<br>vs No) | p-value |
|-----------------------------------------------------------------------------------------|-------------|-------------|------------------------|---------|
|                                                                                         | (N=89)      | (N=25)      |                        |         |
| 1. The dog visitor likes me.                                                            | 1.73 (0.82) | 1.64 (0.76) | -0.517                 | 0.608   |
| 2. I talk to the dog visitor.                                                           | 1.81 (1.17) | 1.52 (0.77) | -1.463                 | 0.149   |
| 3. I confide in the dog visitor.                                                        | 1.44 (0.84) | 1.40 (0.76) | -0.216                 | 0.83    |
| 4. The dog visitor understands what I say.                                              | 1.91 (1.09) | 1.92 (1.18) | 0.025                  | 0.981   |
| 5. The dog visitor knows when I feel bad.                                               | 2.64 (1.25) | 2.40 (1.38) | -0.783                 | 0.439   |
| 6. The dog visitor is always glad to see me.                                            | 2.20 (1.17) | 2.08 (1.15) | -0.467                 | 0.643   |
| 7. The dog visitor prefers me to others.                                                | 4.03 (1.03) | 3.64 (1.38) | -1.326                 | 0.194   |
| 8. The dog visitor has become my friend.                                                | 2.01 (1.27) | 2.00 (1.08) | -0.044                 | 0.965   |
| 9. I look forward to getting up in the morning on days when I will see the dog visitor. | 2.07 (1.33) | 1.88 (1.20) | -0.675                 | 0.504   |
| 10. I tell others about the dog visitor.                                                | 2.42 (1.44) | 1.88 (1.13) | -1.966                 | 0.055   |
| 11. The dog visitor knows when I feel happy                                             | 2.31 (1.25) | 2.24 (1.30) | -0.256                 | 0.8     |
| 12. I would like to have the dog visitor come to my home.                               | 2.19 (1.49) | 1.60 (1.19) | -2.068                 | 0.044   |
| 13. I will remember the dog visitor after my program.                                   | 1.35 (0.83) | 1.24 (0.66) | -0.681                 | 0.499   |
| 14. The dog visitor makes walking easier.                                               | 2.62 (1.51) | 2.64 (1.25) | 0.074                  | 0.941   |
| 15. The dog visitor tries to comfort me.                                                | 1.85 (1.13) | 1.72 (1.06) | -0.542                 | 0.591   |
| 16. The dog visits make me feel better.                                                 | 1.68 (0.95) | 1.40 (0.76) | -1.536                 | 0.131   |
| 17. The dog visits are (not) boring.                                                    | 1.61 (1.02) | 1.68 (1.03) | 0.315                  | 0.754   |
| 18. I feel attached to the dog visitor.                                                 | 2.39 (1.34) | 2.58 (1.32) | 0.626                  | 0.535   |
| 19. The dog visits give me energy.                                                      | 1.92 (1.09) | 1.96 (1.21) | 0.144                  | 0.886   |
| 20. I miss the dog visitor between visits.                                              | 2.43 (1.54) | 2.04 (1.24) | -1.304                 | 0.199   |
| 21. The dog doesn't judge me.                                                           | 1.29 (0.84) | 1.32 (0.99) | 0.129                  | 0.899   |
| 22. I look forward to the dog visits.                                                   | 1.82 (1.13) | 1.44 (0.82) | -1.869                 | 0.067   |
| 23. The dog visits make me feel happy.                                                  | 1.66 (0.95) | 1.40 (0.58) | -1.714                 | 0.091   |
| 24. The dog accepts me just the way I am.                                               | 1.31 (0.68) | 1.08 (0.28) | -2.571                 | 0.012   |
| 25. I make the dog feel better.                                                         | 2.35 (1.18) | 2.33 (0.82) | -0.091                 | 0.928   |
| 26. I make the dog feel happy.                                                          | 2.16 (1.13) | 2.29 (0.95) | 0.578                  | 0.566   |
| 27. The dog takes my mind off my troubles.                                              | 2.07 (1.38) | 1.54 (0.98) | -2.125                 | 0.038   |
| 28. The dog helps me feel secure.                                                       | 2.06 (1.37) | 1.79 (0.93) | -1.107                 | 0.273   |

Total score range: from 28 (always true) to 140 (never true). Individual item range: from 1 (always true) to 5 (never true).

**Supplementary Table S3: “Center for the Study of Animal Wellness Pet Bonding Scale (CSAWPBS)” participant-dog bond according to diagnosis results**

| CSAWPBS                                                                                 | Depression   |               |                               |                            | Psychosis     |              |                               |                            | Behavioral disorder |               |                               |                            | Eating disorder |               |                               |                            |
|-----------------------------------------------------------------------------------------|--------------|---------------|-------------------------------|----------------------------|---------------|--------------|-------------------------------|----------------------------|---------------------|---------------|-------------------------------|----------------------------|-----------------|---------------|-------------------------------|----------------------------|
|                                                                                         | No<br>(N=65) | Yes<br>(N=49) | T-<br>value<br>(Yes vs<br>No) | <i>p</i> -<br><i>value</i> | No<br>(N=109) | Yes<br>(N=5) | T-<br>value<br>(Yes vs<br>No) | <i>p</i> -<br><i>value</i> | No<br>(N=101)       | Yes<br>(N=13) | T-<br>value<br>(Yes vs<br>No) | <i>p</i> -<br><i>value</i> | No<br>(N=74)    | Yes<br>(N=40) | T-<br>value<br>(Yes vs<br>No) | <i>p</i> -<br><i>value</i> |
| 1. The dog visitor likes me.                                                            | 1.65 (0.76)  | 1.80 (0.87)   | 0.964                         | 0.338                      | 1.72 (0.82)   | 1.40 (0.55)  | -1.263                        | 0.264                      | 1.68 (0.80)         | 1.92 (0.86)   | 0.952                         | 0.356                      | 1.73 (0.83)     | 1.68 (0.76)   | -0.354                        | 0.7525                     |
| 2. I talk to the dog visitor.                                                           | 1.74 (1.12)  | 1.76 (1.07)   | 0.081                         | 0.936                      | 1.75 (1.12)   | 1.60 (0.55)  | -0.57                         | 0.591                      | 1.76 (1.09)         | 1.62 (1.19)   | -0.422                        | 0.679                      | 1.66 (1.02)     | 1.90 (1.22)   | 1.052                         | 0.296                      |
| 3. I confide in the dog visitor.                                                        | 1.38 (0.84)  | 1.49 (0.79)   | 0.682                         | 0.497                      | 1.43 (0.83)   | 1.40 (0.55)  | -0.121                        | 0.908                      | 1.47 (0.86)         | 1.15 (0.38)   | -2.316                        | 0.027                      | 1.34 (0.63)     | 1.60 (1.08)   | 1.411                         | 0.164                      |
| 4. The dog visitor understands what I say.                                              | 1.95 (1.15)  | 1.85 (1.05)   | -0.478                        | 0.633                      | 1.93 (1.12)   | 1.60 (0.55)  | -1.217                        | 0.272                      | 1.90 (1.08)         | 2.00 (1.35)   | 0.256                         | 0.802                      | 1.89 (1.15)     | 1.95 (1.04)   | 0.281                         | 0.779                      |
| 5. The dog visitor knows when I feel bad.                                               | 2.62 (1.38)  | 2.55 (1.16)   | -0.271                        | 0.787                      | 2.61 (1.28)   | 2.20 (1.30)  | -0.681                        | 0.531                      | 2.67 (1.25)         | 1.92 (1.38)   | -1.862                        | 0.083                      | 2.38 (1.26)     | 2.98 (1.25)   | 2.427                         | 0.017                      |
| 6. The dog visitor is always glad to see me.                                            | 2.15 (1.16)  | 2.20 (1.17)   | 0.227                         | 0.821                      | 2.17 (1.17)   | 2.40 (1.14)  | 0.45                          | 0.674                      | 2.25 (1.19)         | 1.62 (0.77)   | -2.596                        | 0.017                      | 2.07 (1.15)     | 2.38 (1.17)   | 1.347                         | 0.182                      |
| 7. The dog visitor prefers me to others.                                                | 3.92 (1.12)  | 3.98 (1.13)   | 0.266                         | 0.791                      | 3.94 (1.13)   | 4.20 (0.84)  | 0.678                         | 0.53                       | 4.02 (1.10)         | 3.38 (1.12)   | -1.926                        | 0.073                      | 3.85 (1.15)     | 4.12 (1.04)   | 1.287                         | 0.201                      |
| 8. The dog visitor has become my friend.                                                | 2.06 (1.18)  | 1.94 (1.30)   | -0.519                        | 0.605                      | 2.02 (1.23)   | 1.80 (1.30)  | -0.367                        | 0.731                      | 2.02 (1.23)         | 1.92 (1.26)   | -0.262                        | 0.797                      | 1.96 (1.30)     | 2.10 (1.10)   | 0.609                         | 0.544                      |
| 9. I look forward to getting up in the morning on days when I will see the dog visitor. | 1.94 (1.11)  | 2.14 (1.51)   | 0.799                         | 0.427                      | 2.05 (1.32)   | 1.60 (0.55)  | -1.617                        | 0.154                      | 2.05 (1.31)         | 1.85 (1.21)   | -0.564                        | 0.581                      | 2.01 (1.40)     | 2.05 (1.10)   | 0.158                         | 0.875                      |
| 10. I tell others about the dog visitor.                                                | 2.12 (1.33)  | 2.53 (1.44)   | 1.543                         | 0.126                      | 2.31 (1.40)   | 2.00 (1.22)  | -0.553                        | 0.607                      | 2.34 (1.38)         | 2.00 (1.47)   | -0.782                        | 0.447                      | 2.26 (1.43)     | 2.38 (1.31)   | 0.444                         | 0.658                      |
| 11. The dog visitor knows when I feel happy                                             | 2.22 (1.24)  | 2.41 (1.27)   | 0.808                         | 0.421                      | 2.29 (1.26)   | 2.40 (1.34)  | 0.174                         | 0.87                       | 2.35 (1.25)         | 1.92 (1.26)   | -1.145                        | 0.27                       | 2.22 (1.25)     | 2.45 (1.26)   | 0.947                         | 0.346                      |
| 12. I would like to have the dog visitor come to my home.                               | 1.97 (1.40)  | 2.18 (1.51)   | 0.774                         | 0.441                      | 2.04 (1.43)   | 2.60 (1.82)  | 0.684                         | 0.53                       | 2.07 (1.44)         | 2.00 (1.58)   | -0.15                         | 0.883                      | 2.07 (1.50)     | 2.05 (1.36)   | -0.063                        | 0.95                       |
| 13. I will remember the dog visitor after my program.                                   | 1.37 (0.84)  | 1.27 (0.73)   | -0.705                        | 0.482                      | 1.32 (0.80)   | 1.40 (0.55)  | 0.307                         | 0.771                      | 1.34 (0.79)         | 1.23 (0.83)   | -0.434                        | 0.67                       | 1.26 (0.70)     | 1.45 (0.93)   | 1.146                         | 0.256                      |
| 14. The dog visitor makes walking easier.                                               | 2.54 (1.44)  | 2.73 (1.48)   | 0.709                         | 0.48                       | 2.67 (1.46)   | 1.60 (0.89)  | -2.525                        | 0.053                      | 2.61 (1.44)         | 2.69 (1.60)   | 0.168                         | 0.869                      | 2.54 (1.44)     | 2.78 (1.48)   | 0.815                         | 0.417                      |
| 15. The dog visitor tries to comfort me.                                                | 1.78 (1.04)  | 1.88 (1.21)   | 0.416                         | 0.679                      | 1.83 (1.12)   | 1.60 (0.89)  | -0.563                        | 0.6                        | 1.84 (1.11)         | 1.69 (1.18)   | -0.427                        | 0.676                      | 1.79 (1.17)     | 1.88 (1.02)   | 0.381                         | 0.704                      |

|                                            |             |             |        |       |             |             |        |        |             |             |        |       |             |             |        |       |
|--------------------------------------------|-------------|-------------|--------|-------|-------------|-------------|--------|--------|-------------|-------------|--------|-------|-------------|-------------|--------|-------|
| 16. The dog visits make me feel better.    | 1.55 (0.71) | 1.71 (1.14) | 0.904  | 0.369 | 1.61 (0.93) | 1.80 (0.84) | 0.491  | 0.647  | 1.65 (0.94) | 1.38 (0.77) | -1.141 | 0.27  | 1.59 (1.01) | 1.67 (0.74) | 0.434  | 0.665 |
| 17. The dog visits are (not) boring.       | 1.51 (0.89) | 1.78 (1.16) | 1.347  | 0.181 | 1.65 (1.03) | 1.00 (0.00) | -6.598 | <0.001 | 1.64 (1.04) | 1.46 (0.78) | -0.761 | 0.456 | 1.65 (1.05) | 1.57 (0.96) | -0.378 | 0.706 |
| 18. I feel attached to the dog visitor.    | 2.45 (1.37) | 2.41 (1.29) | -0.179 | 0.858 | 2.47 (1.34) | 1.60 (0.89) | -2.076 | 0.0094 | 2.49 (1.33) | 2.00 (1.28) | -1.237 | 0.237 | 2.27 (1.35) | 2.72 (1.26) | 1.775  | 0.079 |
| 19. The dog visits give me energy.         | 1.86 (1.06) | 2.02 (1.18) | 0.743  | 0.459 | 1.94 (1.12) | 1.60 (0.89) | -0.833 | 0.446  | 1.94 (1.10) | 1.85 (1.21) | -0.267 | 0.793 | 1.91 (1.14) | 1.98 (1.07) | 0.323  | 0.747 |
| 20. I miss the dog visitor between visits. | 2.31 (1.42) | 2.39 (1.57) | 0.281  | 0.779 | 2.37 (1.49) | 1.80 (1.30) | -0.945 | 0.393  | 2.39 (1.49) | 2.00 (1.41) | -0.921 | 0.371 | 2.27 (1.53) | 2.48 (1.40) | 0.723  | 0.472 |
| 21. The dog doesn't judge me.              | 1.23 (0.70) | 1.39 (1.06) | 0.901  | 0.371 | 1.30 (0.89) | 1.20 (0.45) | -0.473 | 0.654  | 1.27 (0.80) | 1.54 (1.33) | 0.718  | 0.485 | 1.35 (0.94) | 1.20 (0.72) | -0.956 | 0.342 |
| 22. I look forward to the dog visits.      | 1.66 (1.00) | 1.84 (1.18) | 0.836  | 0.405 | 1.72 (1.08) | 2.00 (1.22) | 0.494  | 0.646  | 1.76 (1.10) | 1.54 (0.97) | -0.773 | 0.451 | 1.73 (1.10) | 1.75 (1.06) | 0.096  | 0.923 |
| 23. The dog visits make me feel happy.     | 1.52 (0.77) | 1.71 (1.02) | 1.096  | 0.276 | 1.61 (0.90) | 1.40 (0.55) | -0.827 | 0.446  | 1.62 (0.90) | 1.46 (0.78) | -0.695 | 0.497 | 1.59 (0.92) | 1.62 (0.84) | 0.179  | 0.859 |
| 24. The dog accepts me just the way I am.  | 1.17 (0.45) | 1.39 (0.79) | 1.741  | 0.086 | 1.26 (0.63) | 1.40 (0.55) | 0.567  | 0.598  | 1.27 (0.63) | 1.23 (0.60) | -0.206 | 0.84  | 1.30 (0.68) | 1.20 (0.52) | -0.858 | 0.393 |
| 25. I make the dog feel better.            | 2.38 (1.06) | 2.31 (1.19) | -0.288 | 0.774 | 2.35 (1.12) | 2.40 (1.14) | 0.104  | 0.922  | 2.42 (1.13) | 1.75 (0.75) | -2.733 | 0.014 | 2.21 (1.16) | 2.60 (0.98) | 1.892  | 0.062 |
| 26. I make the dog feel happy.             | 2.23 (1.07) | 2.12 (1.14) | -0.516 | 0.607 | 2.20 (1.11) | 2.00 (0.71) | -0.588 | 0.582  | 2.26 (1.11) | 1.58 (0.79) | -2.661 | 0.017 | 2.01 (1.11) | 2.50 (1.01) | 2.354  | 0.021 |
| 27. The dog takes my mind off my troubles. | 1.97 (1.25) | 1.94 (1.42) | -0.121 | 0.904 | 1.97 (1.34) | 1.60 (0.89) | -0.885 | 0.418  | 1.95 (1.30) | 2.00 (1.54) | 0.108  | 0.916 | 1.82 (1.33) | 2.20 (1.29) | 1.485  | 0.141 |
| 28. The dog helps me feel secure.          | 2.06 (1.30) | 1.92 (1.29) | -0.592 | 0.555 | 2.04 (1.30) | 1.20 (0.45) | -3.543 | 0.008  | 2.03 (1.31) | 1.75 (1.14) | -0.792 | 0.441 | 1.79 (1.21) | 2.38 (1.35) | 2.269  | 0.026 |

Total score range: from 28 (always true) to 140 (never true). Individual item range: from 1 (always true) to 5 (never true).
